# Supplementary material for: Nutritional Inadequacy: Unraveling the Methodological Challenges for the Application of the Probability Approach or the EAR Cut-Point Method—A Pregnancy Perspective
Source: MDPI journal article supplement (doi:10.3390/nu13103473), 2021-09-29
Supplement: s1 [file s1]

**Supplementary table 1.** General dietary characteristics of the 608 pregnant women

| <b>Dietary characteristics</b>   | <b>Mean (SD)</b> |
|----------------------------------|------------------|
| Energy (kcal)                    | 2068.40 (226.90) |
| Protein (g/kg/d)                 | 1.39 (0.30)      |
| Protein (g/d)                    | 88.40 (10.54)    |
| Total lipid (g/d)                | 92.10 (11.85)    |
| Carbohydrate (g/d)               | 226.76 (38.13)   |
| % Energy from total protein      | 17.16 (1.81)     |
| % Energy from total lipid        | 40.14 (3.52)     |
| % Energy from carbohydrate       | 43.71 (4.37)     |
| <b>Dietary supplement intake</b> | <b>n (%)</b>     |
| Yes                              | 418 (68.8)       |
| No                               | 190 (31.3)       |

SD: standard deviation

**Supplementary table 2.** Descriptive statistics of usual intake for the twenty-one nutrients explored in the present study (n=608)

|                           | Min    | Max     | Mean    | Median  | SD     | CV (%) | Skewness | Kurtosis |
|---------------------------|--------|---------|---------|---------|--------|--------|----------|----------|
| <b>Protein (g/kg/d)</b>   | 0.50   | 2.41    | 1.39    | 1.39    | 0.30   | 21.16  | 0.17     | 0.01     |
| <b>Carbohydrate (g/d)</b> | 114.20 | 332.69  | 226.76  | 225.42  | 38.13  | 16.81  | 0.32     | -0.13    |
| <b>Fiber (g/d)</b>        | 6.36   | 47.73   | 23.06   | 22.46   | 5.55   | 24.08  | 0.59     | 0.78     |
| <b>Thiamin (mg/d)</b>     | 0.97   | 3.03    | 1.67    | 1.63    | 0.33   | 20.00  | 0.43     | 0.11     |
| <b>Riboflavin (mg/d)</b>  | 0.86   | 3.63    | 2.02    | 2.00    | 0.50   | 24.95  | 0.16     | -0.44    |
| <b>Niacin (mg/d)</b>      | 10.53  | 28.13   | 17.97   | 17.67   | 3.22   | 17.94  | 0.54     | 0.36     |
| <b>Vitamin B6 (mg/d)</b>  | 1.01   | 2.91    | 1.80    | 1.78    | 0.31   | 16.98  | 0.49     | 0.16     |
| <b>Folate (µg/d)</b>      | 119.16 | 610.91  | 316.79  | 311.36  | 73.72  | 23.27  | 0.53     | 0.62     |
| <b>Vitamin B12 (µg/d)</b> | 1.54   | 9.74    | 4.88    | 4.85    | 1.24   | 25.41  | 0.31     | 0.66     |
| <b>Vitamin C (mg/d)</b>   | 10.29  | 377.48  | 134.05  | 126.32  | 61.11  | 45.59  | 0.71     | 0.41     |
| <b>Vitamin A (µg/d)</b>   | 133.23 | 1030.90 | 524.31  | 507.31  | 143.87 | 27.44  | 0.46     | 0.32     |
| <b>Vitamin E (mg/d)</b>   | 6.51   | 26.60   | 11.45   | 10.87   | 2.72   | 23.78  | 1.34     | 2.86     |
| <b>Calcium (mg/d)</b>     | 288.22 | 1891.83 | 1014.74 | 997.91  | 257.95 | 25.42  | 0.31     | 0.15     |
| <b>Phosphorus (mg/d)</b>  | 803.54 | 2251.81 | 1508.01 | 1495.99 | 248.73 | 16.49  | 0.28     | -0.14    |
| <b>Magnesium (mg/d)</b>   | 184.46 | 504.45  | 306.35  | 299.32  | 55.07  | 17.98  | 0.54     | 0.24     |
| <b>Potassium (g/d)</b>    | 1.80   | 5.00    | 3.15    | 3.10    | 0.52   | 16.58  | 0.50     | 0.29     |
| <b>Sodium (g/d)</b>       | 1.20   | 4.10    | 2.25    | 2.20    | 0.42   | 18.63  | 0.61     | 1.08     |
| <b>Zinc (mg/d)</b>        | 7.21   | 16.57   | 11.60   | 11.45   | 1.71   | 14.72  | 0.25     | -0.22    |
| <b>Copper (µg/d)</b>      | 618.73 | 2872.47 | 1374.14 | 1326.76 | 312.48 | 22.74  | 0.64     | 0.51     |
| <b>Selenium (µg/d)</b>    | 39.31  | 125.51  | 72.80   | 71.57   | 13.91  | 19.10  | 0.50     | 0.62     |
| <b>Iron (mg/d)</b>        | 6.12   | 19.53   | 11.35   | 10.94   | 2.17   | 19.16  | 0.76     | 0.60     |

SD: Standard deviation; CV: Coefficient of variation

**Supplementary Table 3.** Detailed percentile distribution of usual intake (n=608).

|                    |        |      | P1   | P5   | P10  | P15  | P20  | P25  | P30  | P35  | P40  | P45  | P50  | P55  | P60  | P65  | P70  | P75  | P80  | P85  | P90  | P95  | P99  |                              |
|--------------------|--------|------|------|------|------|------|------|------|------|------|------|------|------|------|------|------|------|------|------|------|------|------|------|------------------------------|
|                    |        | n    | 6    | 30   | 61   | 91   | 122  | 152  | 182  | 213  | 243  | 274  | 304  | 334  | 365  | 395  | 426  | 456  | 486  | 517  | 547  | 578  | 602  | "Inadequate"<br>population * |
|                    | EAR/AI | RDA  |      |      |      |      |      |      |      |      |      |      |      |      |      |      |      |      |      |      |      |      |      |                              |
| Phosphorus (mg/d)  | 580    | 700  | 982  | 1121 | 1194 | 1248 | 1292 | 1333 | 1369 | 1402 | 1426 | 1467 | 1496 | 1526 | 1553 | 1583 | 1630 | 1669 | 1719 | 1777 | 1845 | 1947 | 2145 | <1%                          |
| Carbohydrate (g/d) | 135    | 175  | 145  | 170  | 182  | 188  | 195  | 199  | 204  | 209  | 214  | 219  | 225  | 229  | 233  | 238  | 244  | 249  | 256  | 268  | 280  | 300  | 321  | <1%                          |
| Vitamin B12 (µg/d) | 2.2    | 2.6  | 2.2  | 2.9  | 3.3  | 3.7  | 3.8  | 4.0  | 4.2  | 4.4  | 4.6  | 4.7  | 4.8  | 5.0  | 5.2  | 5.3  | 5.4  | 5.6  | 5.8  | 6.2  | 6.5  | 6.8  | 8.1  | <1%                          |
| Copper (µg/d)      | 800    | 1000 | 794  | 934  | 1007 | 1052 | 1097 | 1137 | 1172 | 1217 | 1254 | 1289 | 1327 | 1375 | 1419 | 1475 | 1528 | 1584 | 1642 | 1706 | 1781 | 1931 | 2196 | 1-5%                         |
| Selenium (µg/d)    | 49     | 60   | 44   | 51   | 56   | 59   | 61   | 63   | 66   | 67   | 69   | 70   | 72   | 73   | 75   | 77   | 79   | 81   | 83   | 87   | 90   | 98   | 114  | 1-5%                         |
| Protein (g/kg/d)   | 0.88   | 1.1  | 0.75 | 0.93 | 1.02 | 1.07 | 1.14 | 1.18 | 1.24 | 1.27 | 1.31 | 1.36 | 1.39 | 1.42 | 1.46 | 1.52 | 1.55 | 1.60 | 1.66 | 1.70 | 1.76 | 1.89 | 2.11 | 1-5%                         |
| Riboflavin (mg/d)  | 1.2    | 1.4  | 1.0  | 1.2  | 1.4  | 1.5  | 1.6  | 1.7  | 1.7  | 1.8  | 1.9  | 1.9  | 2.0  | 2.1  | 2.2  | 2.2  | 2.3  | 2.4  | 2.5  | 2.6  | 2.7  | 2.9  | 3.2  | 1-5%                         |
| Thiamin (mg/d)     | 1.2    | 1.4  | 1.0  | 1.2  | 1.2  | 1.3  | 1.4  | 1.4  | 1.5  | 1.5  | 1.6  | 1.6  | 1.6  | 1.7  | 1.7  | 1.8  | 1.8  | 1.9  | 2.0  | 2.0  | 2.1  | 2.2  | 2.5  | 1-5%                         |
| Niacin (mg/d)      | 14     | 18   | 12   | 13   | 14   | 15   | 15   | 16   | 16   | 16   | 17   | 17   | 18   | 18   | 18   | 19   | 19   | 20   | 20   | 21   | 22   | 24   | 27   | 5-10%                        |
| Zinc (mg/d)        | 9.5    | 11   | 8.0  | 9.0  | 9.5  | 9.9  | 10.1 | 10.4 | 10.7 | 10.9 | 11.1 | 11.2 | 11.4 | 11.7 | 11.9 | 12.2 | 12.4 | 12.7 | 13.0 | 13.5 | 13.9 | 14.7 | 15.6 | 5-10%                        |
| Vitamin C (mg/d)   | 70     | 85   | 32   | 51   | 60   | 72   | 81   | 88   | 94   | 102  | 109  | 116  | 126  | 137  | 144  | 152  | 164  | 174  | 182  | 194  | 218  | 246  | 306  | 10-15%                       |
| Vitamin B6 (mg/d)  | 1.6    | 1.9  | 1.2  | 1.4  | 1.4  | 1.5  | 1.5  | 1.6  | 1.6  | 1.6  | 1.7  | 1.7  | 1.8  | 1.8  | 1.9  | 1.9  | 1.9  | 2.0  | 2.0  | 2.1  | 2.2  | 2.4  | 2.6  | 20-25%                       |
| Magnesium (mg/d)   | 300    | 360  | 197  | 227  | 243  | 252  | 260  | 266  | 271  | 278  | 287  | 293  | 299  | 307  | 315  | 323  | 331  | 344  | 354  | 365  | 381  | 405  | 456  | 50-55%                       |
| Vitamin A (µg/d)   | 550    | 770  | 240  | 307  | 343  | 381  | 403  | 423  | 444  | 465  | 481  | 492  | 507  | 531  | 552  | 571  | 591  | 615  | 637  | 667  | 720  | 776  | 922  | 55-60%                       |
| Folate (µg/d)      | 520    | 600  | 169  | 207  | 229  | 241  | 255  | 265  | 277  | 285  | 292  | 303  | 311  | 322  | 333  | 341  | 350  | 358  | 370  | 388  | 413  | 448  | 519  | >99%                         |
| Iron (mg/d)        | 22     |      | 7    | 8    | 9    | 9    | 10   | 10   | 10   | 10   | 10   | 11   | 11   | 11   | 12   | 12   | 12   | 13   | 13   | 14   | 14   | 16   | 17   | >99%                         |
| Sodium (g/d)       | 1.5**  |      | 1.4  | 1.6  | 1.7  | 1.8  | 1.9  | 2.0  | 2.0  | 2.1  | 2.1  | 2.2  | 2.2  | 2.3  | 2.3  | 2.4  | 2.4  | 2.5  | 2.6  | 2.6  | 2.8  | 3.0  | 3.4  | 1-5%                         |
| Potassium (g/d)    | 2.9**  |      | 2.1  | 2.4  | 2.5  | 2.6  | 2.7  | 2.8  | 2.9  | 2.9  | 3.0  | 3.0  | 3.1  | 3.2  | 3.2  | 3.3  | 3.4  | 3.5  | 3.6  | 3.7  | 3.8  | 4.1  | 4.7  | 25-30%                       |
| Calcium (mg/d)     | 1000** |      | 448  | 597  | 693  | 753  | 803  | 839  | 874  | 913  | 935  | 970  | 998  | 1026 | 1060 | 1101 | 1141 | 1175 | 1225 | 1270 | 1351 | 1484 | 1662 | 50-55%                       |
| Fiber (g/d)        | 28**   |      | 12   | 15   | 17   | 18   | 18   | 19   | 20   | 21   | 21   | 22   | 22   | 23   | 24   | 25   | 26   | 26   | 28   | 29   | 30   | 33   | 39   | 75-80%                       |

P: Percentile

EAR: Estimated Average Requirement. The intakes equal to the EAR correspond to 50% risk.

RDA: Recommended Dietary Allowance. The intakes equal to the RDA correspond to negligible risk.

\*Rough estimation

\*\* AI: Adequate Intake.

Vitamin E was excluded since it did not meet the assumption of normality.

Population still "at risk" (Rough estimation) - The range of percentiles from the EAR to the RDA values may contribute to the identification of individuals not included in the "inadequate" population, but still "at risk".

Supplementary table 4. Corresponding risk attached to each intake in the percentile distribution.

|               |                        | 75% EAR | EAR  | RDA  | n | P1    | P5    | P10   | P15   | P20   | P25   | P30   | P35   | P40   | P45   | P50   | P55   | P60   | P65   | P70   | P75  | P80  | P85  | P90  | P95  | P99  | % of population with intakes below the EAR | Mean Probability of Inadequacy (%) |
|---------------|------------------------|---------|------|------|---|-------|-------|-------|-------|-------|-------|-------|-------|-------|-------|-------|-------|-------|-------|-------|------|------|------|------|------|------|--------------------------------------------|------------------------------------|
| Phosphorus*   | Usual Intake (mg/d)    | 435     | 580  | 700  |   | 982   | 1121  | 1194  | 1248  | 1292  | 1333  | 1369  | 1402  | 1426  | 1467  | 1496  | 1526  | 1553  | 1583  | 1630  | 1669 | 1719 | 1777 | 1845 | 1947 | 2145 | 0.0                                        |                                    |
|               | Risk of inadequacy (%) | 99.4    | 50.0 | 1.9  |   | 0.0   | 0.0   | 0.0   | 0.0   | 0.0   | 0.0   | 0.0   | 0.0   | 0.0   | 0.0   | 0.0   | 0.0   | 0.0   | 0.0   | 0.0   | 0.0  | 0.0  | 0.0  | 0.0  | 0.0  | 0.0  | 0.0                                        |                                    |
| Carbohydrate* | Usual Intake (mg/d)    | 101     | 135  | 175  |   | 145   | 170   | 182   | 188   | 195   | 199   | 204   | 209   | 214   | 219   | 225   | 229   | 233   | 238   | 244   | 249  | 256  | 268  | 280  | 300  | 321  | 0.2                                        |                                    |
|               | Risk of inadequacy (%) | 95.2    | 50.0 | 2.4  |   | 31.1  | 4.0   | 1.1   | 0.5   | 0.2   | 0.1   | 0.0   | 0.0   | 0.0   | 0.0   | 0.0   | 0.0   | 0.0   | 0.0   | 0.0   | 0.0  | 0.0  | 0.0  | 0.0  | 0.0  | 0.0  | 0.0                                        |                                    |
| Vitamin B12*  | Usual Intake (µg/d)    | 1.7     | 2.2  | 2.6  |   | 2.2   | 2.9   | 3.3   | 3.7   | 3.8   | 4.0   | 4.2   | 4.4   | 4.6   | 4.7   | 4.8   | 5.0   | 5.2   | 5.3   | 5.4   | 5.6  | 5.8  | 6.2  | 6.5  | 6.8  | 8.1  | 0.8                                        |                                    |
|               | Risk of inadequacy (%) | 99.4    | 50.0 | 3.5  |   | 50.0  | 0.0   | 0.0   | 0.0   | 0.0   | 0.0   | 0.0   | 0.0   | 0.0   | 0.0   | 0.0   | 0.0   | 0.0   | 0.0   | 0.0   | 0.0  | 0.0  | 0.0  | 0.0  | 0.0  | 0.0  | 0.0                                        |                                    |
| Copper*       | Usual Intake (µg/d)    | 600     | 800  | 1000 |   | 794   | 934   | 1007  | 1052  | 1097  | 1137  | 1172  | 1217  | 1254  | 1289  | 1327  | 1375  | 1419  | 1475  | 1528  | 1584 | 1642 | 1706 | 1781 | 1931 | 2196 | 1.0                                        |                                    |
|               | Risk of inadequacy (%) | 95.2    | 50.0 | 4.8  |   | 52.0  | 13.2  | 4.2   | 1.8   | 0.7   | 0.2   | 0.1   | 0.0   | 0.0   | 0.0   | 0.0   | 0.0   | 0.0   | 0.0   | 0.0   | 0.0  | 0.0  | 0.0  | 0.0  | 0.0  | 0.0  | 0.0                                        |                                    |
| Selenium*     | Usual Intake (µg/d)    | 37      | 49   | 60   |   | 44    | 51    | 56    | 59    | 61    | 63    | 66    | 67    | 69    | 70    | 72    | 73    | 75    | 77    | 79    | 81   | 83   | 87   | 90   | 98   | 114  | 3.0                                        |                                    |
|               | Risk of inadequacy (%) | 99.4    | 50.0 | 1.2  |   | 84.6  | 31.2  | 8.3   | 1.8   | 0.5   | 0.2   | 0.0   | 0.0   | 0.0   | 0.0   | 0.0   | 0.0   | 0.0   | 0.0   | 0.0   | 0.0  | 0.0  | 0.0  | 0.0  | 0.0  | 0.0  | 0.0                                        |                                    |
| Protein*      | Usual Intake (g/kg/d)  | 0.66    | 0.88 | 1.1  |   | 0.75  | 0.93  | 1.02  | 1.07  | 1.14  | 1.18  | 1.24  | 1.27  | 1.31  | 1.36  | 1.39  | 1.42  | 1.46  | 1.52  | 1.55  | 1.60 | 1.66 | 1.70 | 1.76 | 1.89 | 2.11 | 3.1                                        |                                    |
|               | Risk of inadequacy (%) | 98.1    | 50.0 | 1.9  |   | 89.1  | 31.5  | 9.9   | 3.6   | 0.6   | 0.2   | 0.0   | 0.0   | 0.0   | 0.0   | 0.0   | 0.0   | 0.0   | 0.0   | 0.0   | 0.0  | 0.0  | 0.0  | 0.0  | 0.0  | 0.0  | 0.0                                        |                                    |
| Rivoflavin*   | Usual Intake (mg/d)    | 0.9     | 1.2  | 1.4  |   | 1.0   | 1.2   | 1.4   | 1.5   | 1.6   | 1.7   | 1.7   | 1.8   | 1.9   | 1.9   | 2.0   | 2.1   | 2.2   | 2.2   | 2.3   | 2.4  | 2.5  | 2.6  | 2.7  | 2.9  | 3.2  | 3.1                                        |                                    |
|               | Risk of inadequacy (%) | 99.4    | 50.0 | 4.8  |   | 95.2  | 37.0  | 8.8   | 1.5   | 0.1   | 0.0   | 0.0   | 0.0   | 0.0   | 0.0   | 0.0   | 0.0   | 0.0   | 0.0   | 0.0   | 0.0  | 0.0  | 0.0  | 0.0  | 0.0  | 0.0  | 0.0                                        |                                    |
| Thiamin*      | Usual Intake (mg/d)    | 0.9     | 1.2  | 1.4  |   | 1.0   | 1.2   | 1.3   | 1.4   | 1.4   | 1.5   | 1.5   | 1.6   | 1.6   | 1.6   | 1.6   | 1.7   | 1.7   | 1.8   | 1.8   | 1.9  | 2.0  | 2.0  | 2.1  | 2.2  | 2.5  | 4.3                                        |                                    |
|               | Risk of inadequacy (%) | 99.4    | 50.0 | 4.8  |   | 95.2  | 63.7  | 36.2  | 19.0  | 6.9   | 2.7   | 0.9   | 0.4   | 0.1   | 0.0   | 0.0   | 0.0   | 0.0   | 0.0   | 0.0   | 0.0  | 0.0  | 0.0  | 0.0  | 0.0  | 0.0  | 0.0                                        |                                    |
| Niacin**      | Usual Intake (mg/d)    | 11      | 14   | 18   |   | 12    | 13    | 14    | 15    | 15    | 16    | 16    | 16    | 17    | 17    | 18    | 18    | 18    | 19    | 19    | 20   | 20   | 21   | 22   | 24   | 27   | 6.6                                        |                                    |
|               | Risk of inadequacy (%) | 95.2    | 50.0 | 2.8  |   | 83.0  | 67.3  | 46.0  | 34.4  | 26.0  | 19.7  | 15.8  | 11.8  | 8.4   | 5.9   | 4.0   | 2.5   | 1.7   | 1.0   | 0.6   | 0.3  | 0.1  | 0.0  | 0.0  | 0.0  | 0.0  | 0.0                                        |                                    |
| Zinc*         | Usual Intake (mg/d)    | 7.1     | 9.5  | 11   |   | 8.0   | 9.0   | 9.5   | 9.9   | 10.1  | 10.4  | 10.7  | 10.9  | 11.1  | 11.2  | 11.4  | 11.7  | 11.9  | 12.2  | 12.4  | 12.7 | 13.0 | 13.5 | 13.9 | 14.7 | 15.6 | 9.5                                        |                                    |
|               | Risk of inadequacy (%) | 99.4    | 50.0 | 5.7  |   | 94.3  | 70.7  | 51.3  | 35.5  | 26.5  | 18.5  | 10.7  | 7.5   | 4.8   | 3.3   | 2.0   | 1.1   | 0.5   | 0.2   | 0.1   | 0.0  | 0.0  | 0.0  | 0.0  | 0.0  | 0.0  | 0.0                                        |                                    |
| Vitamin C*    | Usual Intake (mg/d)    | 53      | 70   | 85   |   | 32    | 51    | 60    | 72    | 81    | 88    | 94    | 102   | 109   | 116   | 126   | 137   | 144   | 152   | 164   | 174  | 182  | 194  | 218  | 246  | 306  | 13.7                                       |                                    |
|               | Risk of inadequacy (%) | 99.4    | 50.0 | 1.6  |   | 100.0 | 99.7  | 92.2  | 41.0  | 6.4   | 0.5   | 0.0   | 0.0   | 0.0   | 0.0   | 0.0   | 0.0   | 0.0   | 0.0   | 0.0   | 0.0  | 0.0  | 0.0  | 0.0  | 0.0  | 0.0  | 0.0                                        |                                    |
| Vitamin B6**  | Usual Intake (mg/d)    | 1.2     | 1.6  | 1.9  |   | 1.2   | 1.4   | 1.4   | 1.5   | 1.5   | 1.6   | 1.6   | 1.6   | 1.7   | 1.7   | 1.8   | 1.8   | 1.9   | 1.9   | 1.9   | 2.0  | 2.0  | 2.1  | 2.2  | 2.4  | 2.6  | 23.5                                       |                                    |
|               | Risk of inadequacy (%) | 99.4    | 50.0 | 3.0  |   | 99.4  | 92.8  | 84.7  | 76.8  | 67.7  | 60.2  | 50.5  | 38.2  | 26.9  | 19.3  | 13.0  | 8.3   | 5.3   | 3.0   | 1.5   | 0.6  | 0.3  | 0.1  | 0.0  | 0.0  | 0.0  | 0.0                                        |                                    |
| Magnesium***  | Usual Intake (mg/d)    | 225     | 300  | 360  |   | 197   | 227   | 243   | 252   | 260   | 266   | 271   | 278   | 287   | 293   | 299   | 307   | 315   | 323   | 331   | 344  | 354  | 365  | 381  | 405  | 456  | 50.0                                       |                                    |
|               | Risk of inadequacy (%) | 99.4    | 50.0 | 2.3  |   | 100.0 | 99.3  | 97.1  | 94.4  | 91.1  | 87.3  | 83.2  | 76.9  | 66.9  | 58.7  | 50.9  | 41.3  | 31.3  | 22.5  | 14.8  | 7.1  | 3.5  | 1.5  | 0.3  | 0.0  | 0.0  | 0.0                                        |                                    |
| Vitamin A***  | Usual Intake (µg/d)    | 413     | 550  | 770  |   | 240   | 307   | 343   | 381   | 403   | 423   | 444   | 465   | 481   | 492   | 507   | 531   | 552   | 571   | 591   | 615  | 637  | 667  | 720  | 776  | 922  | 59.5                                       |                                    |
|               | Risk of inadequacy (%) | 89.4    | 50.0 | 2.3  |   | 99.8  | 98.6  | 97.0  | 93.8  | 91.0  | 87.6  | 83.2  | 78.0  | 73.5  | 70.2  | 65.1  | 56.8  | 49.4  | 42.6  | 35.4  | 27.6 | 21.6 | 14.3 | 6.1  | 2.0  | 0.0  | 0.0                                        |                                    |
| Folate***     | Usual Intake (µg/d)    | 390     | 520  | 600  |   | 169   | 207   | 229   | 241   | 255   | 265   | 277   | 285   | 292   | 303   | 311   | 322   | 333   | 341   | 350   | 358  | 370  | 388  | 413  | 448  | 519  | 99.2                                       |                                    |
|               | Risk of inadequacy (%) | 99.4    | 50.0 | 6.2  |   | 100.0 | 100.0 | 100.0 | 100.0 | 100.0 | 100.0 | 100.0 | 100.0 | 100.0 | 100.0 | 100.0 | 100.0 | 100.0 | 100.0 | 100.0 | 99.9 | 99.9 | 99.8 | 99.4 | 98.0 | 91.7 | 50.7                                       |                                    |

P: Percentile

EAR: Estimated Average Requirement. The intakes equal to the EAR correspond to 50% risk.

RDA: Recommended Dietary Allowance. The intakes equal to the RDA correspond to negligible risk.

Vitamin E was excluded since it did not meet the assumption of normality.

\*: Mean Intake Value > EAR, RDA

\*\*: EAR < Mean Intake Value ≤ RDA

\*\*\*: Mean Intake Value < EAR, RDA

Population still "at risk"

Mean Intake Value
